# Supplementary material for: Genome-wide identification and functional analysis of circRNAs in Zea mays
Source: PubMed Central journal article supplement (PMC6289457; doi:10.1371/journal.pone.0202375), 2018-12-11
Supplement: pone.0202375.s001.pdf [file pone.0202375.s001.pdf]

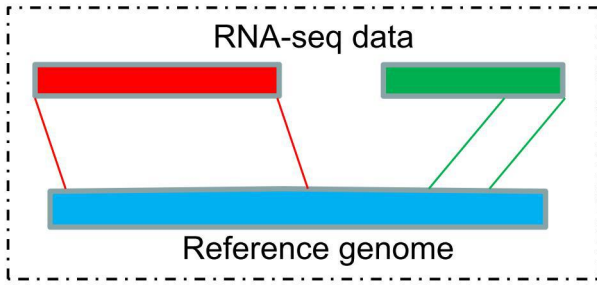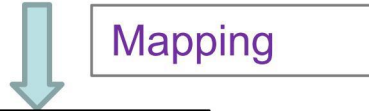

Unmapped

A black-bordered box containing the word "Unmapped".

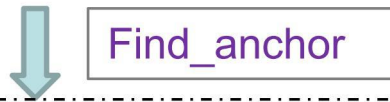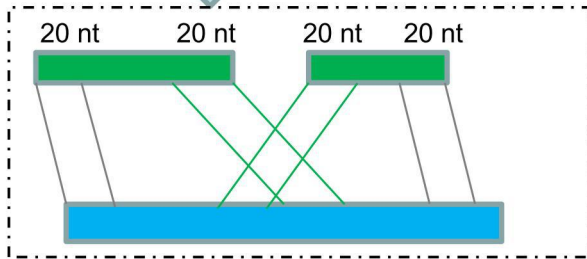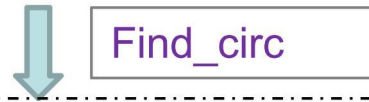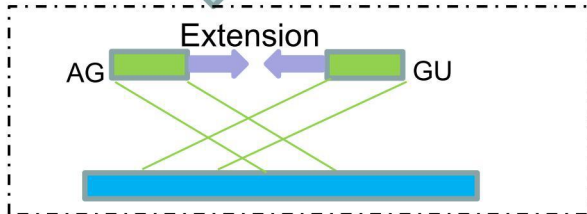

Candidates

A light blue arrow points downwards from the third diagram to a black-bordered box containing the word "Candidates".
