# Supplementary material for: Genome-wide identification and functional analysis of circRNAs in Zea mays
Source: PubMed Central journal article supplement (PMC6289457; doi:10.1371/journal.pone.0202375), 2018-12-11

A

### Circle of single exon

Gene\_id: 20845723

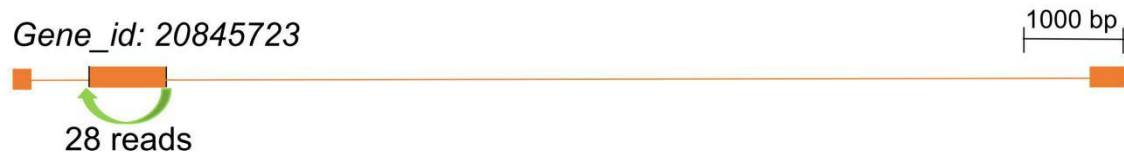

### Circle of multiple exons

Gene\_id: 20841819

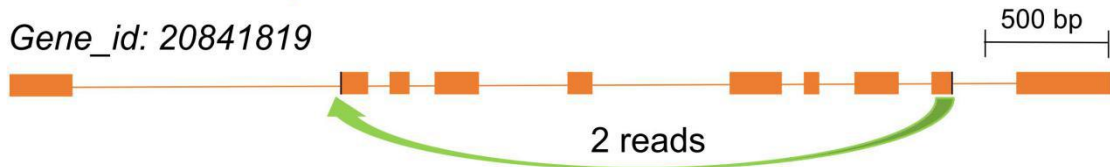

### Multiple circles of multiple exons

Gene\_id: 20855046

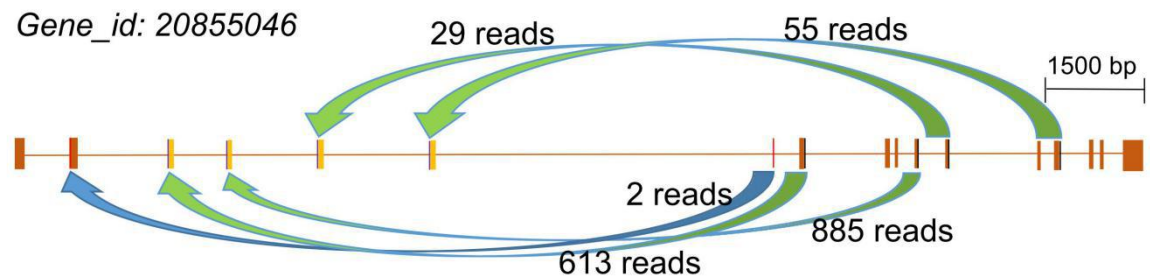

B

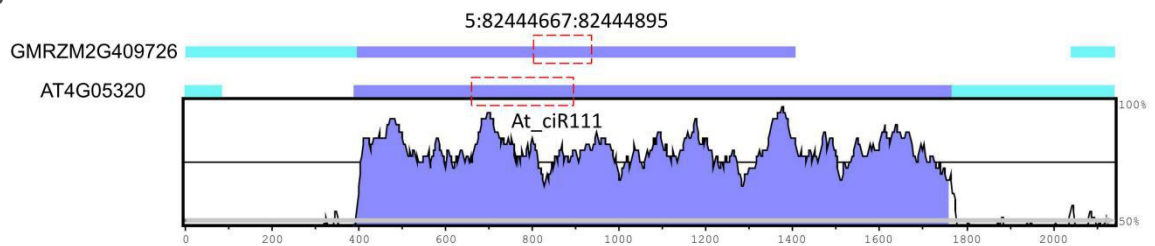

Supplement: pone.0202375.s002.pdf [file pone.0202375.s002.pdf]
