# Supplementary material for: Genome-wide identification and functional analysis of circRNAs in Zea mays
Source: PubMed Central journal article supplement (PMC6289457; doi:10.1371/journal.pone.0202375), 2018-12-11

**A**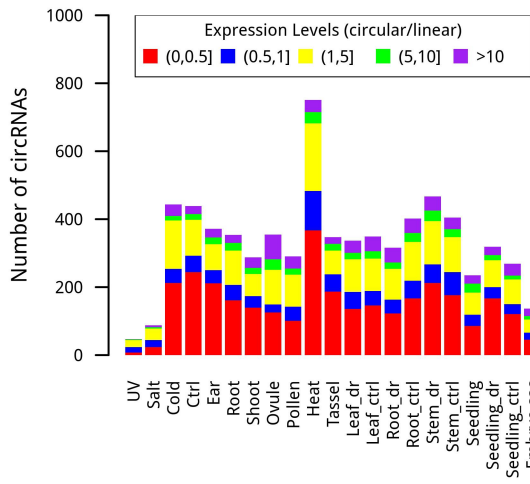**B**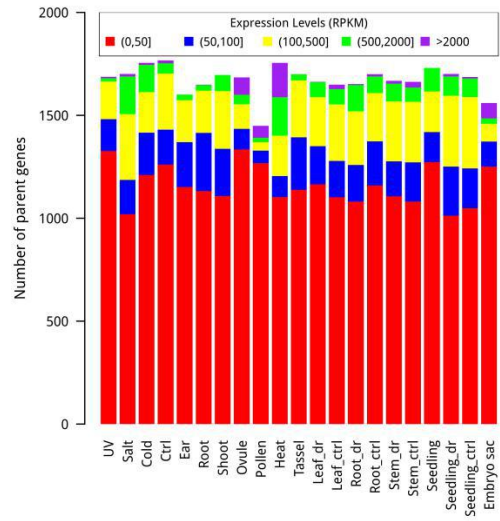**C**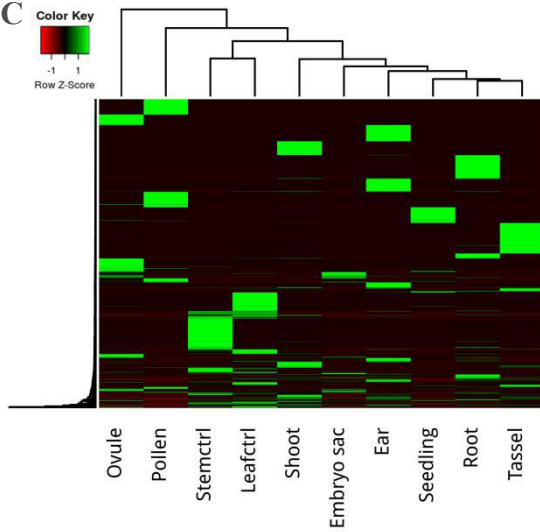**D**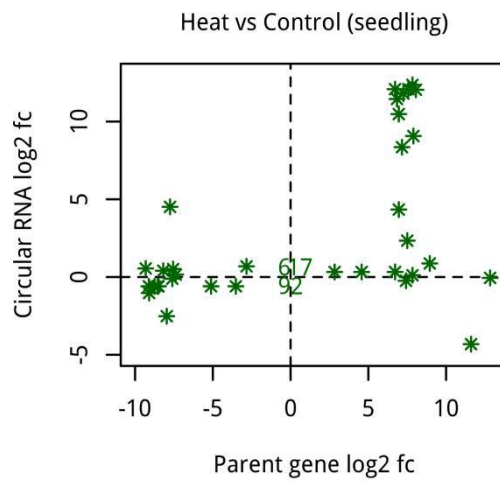

Supplement: pone.0202375.s003.pdf [file pone.0202375.s003.pdf]
