# Supplementary material for: Genome-wide identification and functional analysis of circRNAs in Zea mays
Source: PubMed Central journal article supplement (PMC6289457; doi:10.1371/journal.pone.0202375), 2018-12-11

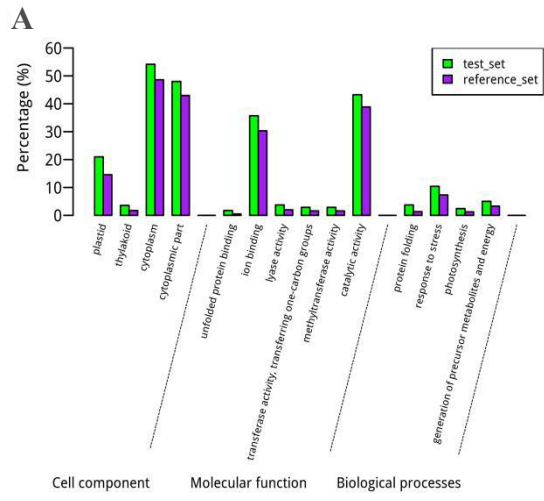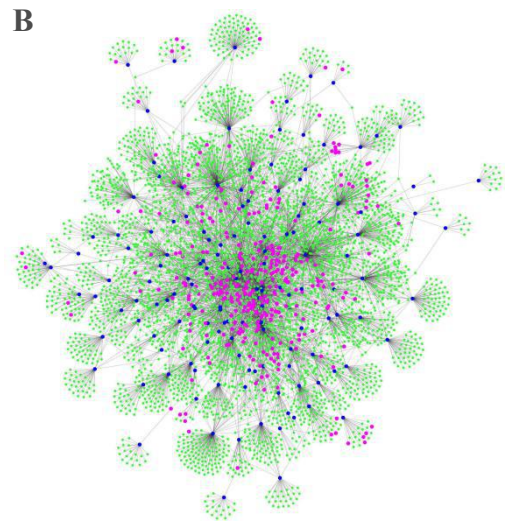

Supplement: pone.0202375.s004.pdf [file pone.0202375.s004.pdf]
